# Supplementary material
Source: ML conference proceedings conference paper supplement (https://proceedings.neurips.cc/paper_files/paper/2016/hash/2ba596643cbbbc20318224181fa46b28-Abstract.html)
Supplement: Supplementary file [file 2ba596643cbbbc20318224181fa46b28-Supplemental.zip]

## A Upper Bound

We provide the proof in the following three subsections. We will repeatedly use the following result.

**Lemma 7.** For all  $u > 0$ ,  $\sum_{t=u+1}^{\infty} \mathbb{P}(\mathcal{B}_{k^*,t} < \mu_*) \leq \frac{M\nu}{\rho-2} \frac{1}{u^{\rho-2}}$ .

*Proof.* The proof is straightforward using a union bound.

$$\begin{aligned} \mathbb{P}(\mathcal{B}_{k^*,t} < \mu_*) &= \mathbb{P}(\exists m \in \{1, \dots, M\}, \exists 1 \leq s \leq t-1, \mathcal{B}_{k^*,t}^{(m)}(s) \leq \mu_*) \\ &= \sum_{m=1}^M \sum_{s=1}^{t-1} \mathbb{P}\left(\bar{X}_{k^*,s}^{(m)} - \mu_{k^*}^{(m)} < \mu_* - \mu_{k^*}^{(m)} - \zeta^{(m)} - \psi^{-1}\left(\frac{\rho \log(t)}{s}\right)\right) \\ &\leq \sum_{m=1}^M \sum_{s=1}^{t-1} \nu t^{-\rho} \leq M\nu t^{1-\rho} \end{aligned} \quad (8)$$

In the third step we have used  $\mu_* - \mu_k^{(m)} \leq \zeta^{(m)}$ . The result follows by bounding the sum with the integral  $\sum_{t=u+1}^{\infty} t^{1-\rho} \leq \int_u^{\infty} t^{1-\rho} = u^{2-\rho}/(\rho-2)$ .  $\square$

### A.1 Proof of Lemma 5

We first provide a formal statement of Lemma 5.

**Lemma 8.** Let  $m \leq M$  and consider any arm  $k \in \mathcal{K}^{(m)}$ . After  $n$  time steps of  $(\gamma, \rho)$ -MF-UCB with  $\rho > 2$  and  $\gamma > 0$ , we have the following bounds on  $\mathbb{E}[T_{k,n}^{(\ell)}]$  for  $\ell = 1, \dots, M$ .

$$T_{k,n}^{(\ell)} \leq \frac{\rho \log(n)}{\psi(\gamma^{(m)})} + 1, \quad \forall \ell < m, \quad \mathbb{E}[T_{k,n}^{(m)}] \leq \frac{\rho \log(n)}{\psi(\Delta_k^{(m)}/2)} + \kappa_\rho, \quad \mathbb{E}[T_{k,n}^{(>m)}] \leq \kappa_\rho.$$

Here,  $\kappa_\rho = 1 + \frac{\nu}{2} + \frac{M\nu}{\rho-2}$  is a constant.

*Proof.* As  $n$  is fixed in this proof, we will write  $\mathbb{E}[\cdot], \mathbb{P}(\cdot)$  for  $\mathbb{E}[\cdot|N = n], \mathbb{P}(\cdot|N = n)$ . Let  $\phi_t^{(m)} = \lfloor \frac{\rho \log(t)}{\psi(\gamma^{(m)})} \rfloor$ . By design of the algorithm we won't play any arm more than  $\phi_n^{(m)} + 1$  times at any  $m < M$ . To see this, assume we have already played  $\phi_n^{(m)} + 1$  times at any  $t < n$ . Then,

$$\psi^{-1}\left(\frac{\rho \log(t)}{T_{k,t-1}^{(m)}}\right) < \psi^{-1}\left(\frac{\rho \log(t)}{\rho \log(n)} \psi(\gamma^{(m)})\right) \leq \gamma^{(m)},$$

and we will proceed to the  $(m+1)^{\text{th}}$  fidelity in step 2 of Algorithm 1. This gives the first part of the theorem. For any  $\ell \geq m$  we can avoid the  $\frac{1}{\psi(\gamma^{(m)})}$  dependence to obtain tighter bounds.

For the case  $\ell = m$ , our analysis follows usual multi-armed bandit analyses [2, 5]. For any  $u \leq n$ , we can bound  $T_{k,n}^{(m)}$  via  $T_{k,n}^{(m)} \leq u + \sum_{t=u+1}^n Z_{k,t,u}^{(m)}$  where  $Z_{k,t,u}^{(m)} = \mathbb{1}\{m_t = m \wedge I_t = k \wedge T_{k,t-1}^{(m)} \geq u\}$ . We relax  $Z_{k,t,u}^{(m)}$  further via,

$$\begin{aligned} Z_{k,t,u}^{(m)} &\leq \mathbb{1}\{T_{k,t-1}^{(\ell)} > \phi_t^{(\ell)} \forall \ell \leq m-1 \wedge u \leq T_{k,t-1}^{(m)} \leq \phi_t^{(m)} \wedge \mathcal{B}_{k,t} > \mathcal{B}_{k^*,t}\} \\ &\leq \mathbb{1}\{T_{k,t-1}^{(m)} \geq u \wedge \mathcal{B}_{k,t}^{(m)}(T_{k,t-1}^{(m)}) \geq \mu_*\} + \mathbb{1}\{\mathcal{B}_{k^*,t} < \mu_*\} \\ &\leq \mathbb{1}\{\exists u \leq s \leq t-1 : \mathcal{B}_{k,t}^{(m)}(s) > \mu_*\} + \mathbb{1}\{\mathcal{B}_{k^*,t} < \mu_*\}. \end{aligned}$$

This yields,  $\mathbb{E}[T_{k,n}^{(m)}] \leq u + \sum_{t=u+1}^n \sum_{s=u}^{t-1} \mathbb{P}(\mathcal{B}_{k,t}^{(m)}(s) > \mu_*) + \sum_{t=u+1}^n \mathbb{P}(\mathcal{B}_{k^*,t} < \mu_*)$ . The third term in this summation is bounded by  $M\nu/(\rho-2)$  using Lemma 7. To bound the second, choose  $u = \lceil \rho \log(n)/\psi(\Delta_k^{(m)}/2) \rceil$ . Then,

$$\mathbb{P}(\mathcal{B}_{k,t}^{(m)}(s) > \mu_*) = \mathbb{P}\left(\bar{X}_{k,s}^{(m)} - \mu_k^{(m)} > \mu_* - \mu_k^{(m)} - \zeta^{(m)} - \psi^{-1}\left(\frac{\rho \log(t)}{s}\right)\right)$$

$$\leq \mathbb{P}(\bar{X}_{k,s}^{(m)} - \mu_k^{(m)} > \Delta_k^{(m)}/2) \leq \nu \exp\left(-s\psi\left(\frac{\Delta_k^{(m)}}{2}\right)\right) \leq \nu n^{-\rho} \quad (9)$$

In the second and last steps we have used  $\psi^{-1}(\rho \log(t)/s) < \psi^{-1}(\rho \log(t)/u) \leq \Delta_k^{(m)}/2$  since  $\psi^{-1}$  is increasing and  $u > \rho \log(n)/\psi(\Delta_k^{(m)}/2)$ . Since there are at most  $n^2$  terms in the summation, the second term is bounded by  $\nu n^{2-\rho}/2 \leq \nu/2$ . Collecting the terms gives the bound on  $\mathbb{E}[T_{k,n}^{(m)}]$ .

To bound  $T_{k,n}^{(>m)}$  we write  $T_{k,n}^{(>m)} \leq u + \sum_{t=u+1}^n Z_{k,t,u}^{(>m)}$  where

$$\begin{aligned} Z_{k,t,u}^{(>m)} &= \mathbb{1}\{m_t > m \quad \wedge \quad I_t = k \quad \wedge \quad T_{k,t-1}^{(>m)} \geq u\} \\ &\leq \mathbb{1}\{T_{k,t-1}^{(\ell)} > \phi_t^{(\ell)} \forall \ell \leq m \quad \wedge \quad \mathcal{B}_{k,t} > \mathcal{B}_{k^*,t} \quad \wedge \quad T_{k,t-1}^{(>m)} \geq u\} \\ &\leq \mathbb{1}\{T_{k,t-1}^{(m)} > \phi_t^{(m)} \quad \wedge \quad \mathcal{B}_{k,t}^{(m)}(T_{k,t-1}^{(m)}) > \mu_\star\} + \mathbb{1}\{\mathcal{B}_{k^*,t} < \mu_\star\} \\ &\leq \mathbb{1}\{\exists \phi_t^{(m)} + 1 \leq s \leq t-1 : \mathcal{B}_{k,t}^{(m)}(s) > \mu_\star\} + \mathbb{1}\{\mathcal{B}_{k^*,t} < \mu_\star\} \end{aligned}$$

This yields,  $\mathbb{E}[T_{k,n}^{(>m)}] \leq u + \sum_{t=u+1}^n \sum_{s=\phi_t^{(m)}+1}^{t-1} \mathbb{P}(\mathcal{B}_{k,t}^{(m)}(s) > \mu_\star) + \sum_{t=u+1}^n \mathbb{P}(\mathcal{B}_{k^*,t} < \mu_\star)$ . The inner term inside the double summation can be bounded via,

$$\begin{aligned} \mathbb{P}(\mathcal{B}_{k,t}^{(m)}(s) > \mu_\star) &= \mathbb{P}\left(\bar{X}_{k,s}^{(m)} - \mu_k^{(m)} > \mu_\star - \mu_k^{(m)} - \zeta^{(m)} - \psi^{-1}\left(\frac{\rho \log(t)}{s}\right)\right) \\ &\leq \mathbb{P}(\bar{X}_{k,s}^{(m)} - \mu_k^{(m)} > \Delta_k^{(m)} - \gamma^{(m)}) \leq \nu \exp(-s\psi(\Delta_k^{(m)} - \gamma^{(m)})) \\ &\leq \nu \exp\left(-\frac{\psi(\Delta_k^{(m)} - \gamma^{(m)})}{\psi(\gamma^{(m)})} \rho \log(t)\right) \leq \nu t^{-\rho} \end{aligned} \quad (10)$$

The second step follows from  $s > \phi_t^{(m)} > \rho \log(t)/\psi(\gamma^{(m)})$  and the last step uses  $\psi(\Delta_k^{(m)} - \gamma^{(m)}) > \psi(\gamma^{(m)})$  when  $\Delta_k^{(m)} > 2\gamma^{(m)}$ . To bound the summation, we use  $u = 1$  and bound it by an integral:  $\sum_{t=u+1}^n t^{-\rho+1} \leq 1/(2u^{\rho-2}) \leq 1/2$ . Collecting the terms gives the bound on  $\mathbb{E}[T_{k,n}^{(>m)}]$ .  $\square$

## A.2 Proof of Lemma 6

We first provide a formal statement of Lemma 6.

**Lemma 9.** Consider any arm  $k \in \mathcal{K}^{(m)}$ . For  $(\gamma, \rho)$ -MF-UCB with  $\rho > 2$  and  $\gamma > 0$ , we have the following concentration results for  $\ell = 1, \dots, M$  for any  $x \geq 1$ .

$$\begin{aligned} \mathbb{P}\left(T_{k,n}^{(m)} > x \left(1 + \frac{\rho \log(n)}{\psi(\Delta_k^{(m)}/2)}\right)\right) &\leq \frac{\nu \tilde{\kappa}_{k,\rho}^{(m)}}{(x \cdot \log(n))^{\rho-1}} + \frac{\nu}{n^{x\rho-1}}. \\ \mathbb{P}\left(T_{k,n}^{(>m)} > x\right) &\leq \frac{M\nu}{\rho-1} \frac{1}{x^{\rho-1}} + \frac{1}{(\rho-2)x^{\rho-2}} \end{aligned}$$

$$\text{Here, } \tilde{\kappa}_{k,\rho}^{(m)} = \frac{M}{\rho-1} \left(\frac{\psi(\Delta_k^{(m)}/2)}{\rho}\right)^{\rho-1}.$$

*Proof.* For the first inequality, we modify the analysis in Audibert et al. [2] to the multi-fidelity setting. We begin with the following observation for all  $u \in \mathbb{N}$ .

$$\begin{aligned} \{\forall t : u+1 \leq t \leq n, \mathcal{B}_{k,t}^{(m)}(u) \leq \mu_\star\} &\cap \\ \bigcap_{m=1}^M \{\forall 1 \leq s \leq n-u : \mathcal{B}_{k^*,u+s}^{(m)}(s) > \mu_\star\} &\implies T_{k,n}^{(m)} \leq u \end{aligned} \quad (11)$$

To prove this, consider  $s^{(m)}, m = 1, \dots, M$  such that  $s^{(1)} \geq 1, s^{(m)} \geq 0, \forall m \neq 1$ . For all  $u + \sum_{m=1}^M s^{(m)} \leq t \leq n$  and for all  $\ell = 1, \dots, M$  we have

$$\mathcal{B}_{k^*,t}^{(\ell)}(s^{(\ell)}) \geq \mathcal{B}_{k^*,u+s}^{(\ell)}(s^{(\ell)}) > \mu_\star \geq \mathcal{B}_{k,t}^{(m)}(u) \geq \mathcal{B}_{k,t}^{(m)}(T_{k,t-1}^{(m)}).$$

This means that arm  $k$  will not be the  $\mathcal{B}_{k,t}$  maximiser at any time  $u < t < n$  and consequently it won't be played more than  $u + 1$  times at the  $m^{\text{th}}$  fidelity. Via the union bound we have,

$$\mathbb{P}(T_{k,n}^{(m)} > u) \leq \sum_{t=u+1}^n \mathbb{P}(\mathcal{B}_{k,t}^{(m)}(u) > \mu_\star) + \sum_{m=1}^M \sum_{s=1}^{n-u} \mathbb{P}(\mathcal{B}_{k_\star, u+s}^{(m)}(s) < \mu_\star).$$

We will use  $u = \lceil x(1 + \rho \log(n)/\psi(\Delta_k^{(m)}/2)) \rceil$ . Bounding the inner term of the second double summation closely mimics the calculations in (8) via which it can be shown  $\mathbb{P}(\mathcal{B}_{k_\star, u+s}^{(m)}(s) < \mu_\star) \leq \nu(u+s)^{-\rho}$ . The second term is then bounded by an integral as follows,

$$\sum_{m=1}^M \sum_{s=1}^{n-u} \mathbb{P}(\mathcal{B}_{k_\star, u+s}^{(m)}(s) < \mu_\star) \leq M \sum_{s=1}^{n-u} \nu(u+s)^{-\rho} \leq M\nu \int_u^n t^{-\rho} \leq \frac{M\nu u^{1-\rho}}{\rho-1} \leq \frac{\nu \tilde{\kappa}_{k,\rho}^{(m)}}{(x \cdot \log(n))^{\rho-1}}$$

The inner term of the first summation mimics the calculations in (9). Noting that  $s > x\rho \log(n)/\psi(\Delta_k^{(m)}/2)$  it can be shown  $\mathbb{P}(\mathcal{B}_{k,t}^{(m)}(u) > \mu_\star) \leq \nu n^{-\rho x}$  which bounds the outer summation by  $\nu n^{-\rho x+1}$ . This proves the first concentration result.

For the second, we begin with the following observation for all  $u \in \mathbb{N}$ .

$$\{\forall t : u+1 \leq t \leq n, \mathcal{B}_{k,t}^{(m)}(T_{k,t-1}^{(m)}) \leq \mu_\star \quad \vee \quad T_{k,t-1}^{(m)} \leq \phi_t^{(m)}\} \cap \bigcap_{m=1}^M \{\forall 1 \leq s \leq n-u : \mathcal{B}_{k_\star, u+s}^{(m)}(s) > \mu_\star\} \implies T_{k,n}^{(>m)} \leq u \quad (12)$$

To prove this first note that when  $T_{k,t-1}^{(m)} \leq \phi_t^{(m)}$  we will play at the  $m^{\text{th}}$  fidelity or lower. Otherwise, consider  $s^{(m)}, m = 1, \dots, M$  such that  $s^{(1)} \geq 1$  and  $s^{(m)} \geq 0, \forall m$ . For all  $u + \sum_{m=1}^M s^{(m)} \leq t \leq n$  and for all  $\ell = 1, \dots, M$  we have

$$\mathcal{B}_{k_\star, t}^{(\ell)}(s^{(\ell)}) \geq \mathcal{B}_{k_\star, u+s}^{(\ell)}(s^{(\ell)}) > \mu_\star \geq \mathcal{B}_{k,t}^{(m)}(T_{k,t-1}^{(m)}).$$

This means that arm  $k$  will not be played at time  $t$  and consequently for any  $t > u$ . After a further relaxation we get,

$$\mathbb{P}(T_{k,n}^{(>m)} > u) \leq \sum_{t=u+1}^n \sum_{s=\phi_t^{(m)}+1}^{t-1} \mathbb{P}(\mathcal{B}_{k,t}^{(m)}(s) > \mu_\star) + \sum_{m=1}^M \sum_{s=1}^{n-u} \mathbb{P}(\mathcal{B}_{k_\star, u+s}^{(m)}(s) < \mu_\star)$$

The second summation is bounded via  $\frac{M\nu}{(\rho-1)u^{\rho-1}}$ . Following an analysis similar to (10), the inner term of the first summation can be bounded by  $\nu t^{-\rho}$  which bounds the first term by  $u^{2-\rho}/(\rho-2)$ . The result follows by using  $u = x$  in (12).  $\square$

### A.3 Proof of Theorem 2

We first establish the following Lemma.

**Lemma 10** (Regret of MF-UCB). *Let  $\rho > 4$ . There exists  $\Lambda_0$  depending on  $\lambda^{(1)}, \lambda^{(M)}$  such that for all  $\Lambda > \Lambda_0$ ,  $(\gamma, \rho)$ -MF-UCB satisfies,*

$$\mathbb{E}[R(\Lambda)] \leq \mu_\star \lambda^{(M)} + \sum_{k=1}^K \Delta_k^{(M)} \left( \sum_{\ell=1}^{\lfloor k \rfloor - 1} \lambda^{(\ell)} \frac{\rho(\log(n_\Lambda) + c)}{\psi(\gamma^{(\ell)})} + \lambda^{(\lfloor k \rfloor)} \frac{\rho(\log(n_\Lambda) + c)}{\psi(\Delta_k^{(\lfloor k \rfloor)}/2)} + \mu_\star \kappa_\rho \lambda^{(M)} \right)$$

Here  $c = 1 + \log(2)$  and  $\kappa_\rho = 1 + \frac{\nu}{\rho-2} + \frac{M\nu}{\rho-2}$  are constants.

Denote the set of arms ‘‘above’’  $\mathcal{K}^{(m)}$  by  $\widehat{\mathcal{K}}^{(m)} = \bigcup_{\ell=m+1}^M \mathcal{K}^{(\ell)}$  and those ‘‘below’’  $\mathcal{K}^{(m)}$  by  $\check{\mathcal{K}}^{(m)} = \bigcup_{\ell=1}^{m-1} \mathcal{K}^{(\ell)}$ . We first observe,

$$\left( \forall m \leq M-1, \forall k \in \mathcal{K}^{(m)}, T_{k,n}^{(m)} \leq x \left( 1 + \frac{\rho \log(n)}{\psi(\Delta_k^{(m)}/2)} \right) \quad \wedge \quad T_{k,n}^{(>m)} \leq y \right) \quad (13)$$

$$\implies \sum_{m=1}^{M-1} Q_n^{(m)} \leq Ky + \sum_{m=1}^{M-1} \sum_{k \in \mathcal{K}^{(m)}} x \left( 1 + \frac{\rho \log(n)}{\psi(\Delta_k^{(m)}/2)} \right) + \sum_{m=1}^{M-1} |\widehat{\mathcal{K}}^{(m)}| \left( 1 + \frac{\rho \log(n)}{\psi(\gamma^{(m)})} \right)$$

To prove this we first note that the LHS of (13) is reducible to,

$$\forall m \leq M-1, \quad Q_n^{(m)} \leq \sum_{k \in \tilde{\mathcal{K}}^{(m)}} T_{k,n}^{(m)} + \sum_{k \in \mathcal{K}^{(m)}} x \left( 1 + \frac{\rho \log(n)}{\psi(\Delta_k^{(m)}/2)} \right) + \sum_{k \in \tilde{\mathcal{K}}^{(m)}} \left( 1 + \frac{\rho \log(n)}{\psi(\gamma^{(m)})} \right)$$

The statement follows by summing the above from  $m = 1, \dots, M-1$  and rearranging the  $T_{k,n}^{(>m)}$  terms to obtain,

$$\begin{aligned} \sum_{m=1}^{M-1} \sum_{k \in \tilde{\mathcal{K}}^{(m)}} T_{k,n}^{(m)} &= \sum_{m=1}^{M-1} \sum_{\ell=1}^{m-1} \sum_{k \in \mathcal{K}^{(\ell)}} T_{k,n}^{(m)} = \sum_{m=1}^{M-2} \sum_{k \in \mathcal{K}^{(m)}} \sum_{\ell=m+1}^{M-1} T_{k,n}^{(\ell)} \leq \sum_{m=1}^{M-2} \sum_{k \in \mathcal{K}^{(m)}} T_{k,n}^{(>m)} \\ &\leq (K - |\mathcal{K}^{(M-1)} \cup \mathcal{K}^{(M)} \cup \mathcal{K}_*|)y \leq Ky. \end{aligned}$$

Now for the given  $\Lambda$  under consideration, define  $\delta_\Lambda = \frac{1}{\log(\Lambda/\lambda^{(1)})}$ . In addition define,

$$\begin{aligned} x_{n,\delta} &= \max \left( 1, \frac{1}{\rho} \left( 3 + \frac{\log(2\nu\pi^2 K/(3\delta))}{\log(n)} \right), \left( \frac{2\pi^2 K\nu M}{3(\rho-1)\delta} \right)^{\frac{1}{\rho-1}} \frac{\psi(\Delta_k^{(m)}/2)}{\rho} n^{\frac{2}{\rho-1}} \right). \\ y_{n,\delta} &= \max \left( 1, \left( \frac{2\pi^2 K M \nu}{3(\rho-1)\delta} \right)^{\frac{1}{\rho-1}} n^{\frac{2}{\rho-1}}, \left( \frac{\pi^2 K}{3\delta} \right)^{\frac{1}{\rho-2}} n^{\frac{2}{\rho-2}} \right). \end{aligned}$$

Now choose  $n_{0,\Lambda}$  to be the smallest  $n$  such that the following holds for all  $n \geq n_{0,\Lambda}$ .

$$\frac{n}{2} \geq Ky_{n,\delta_\Lambda} + \sum_{m=1}^{M-1} \sum_{k \in \mathcal{K}^{(m)}} x_{n,\delta_\Lambda} \left( 1 + \frac{\rho \log(n)}{\psi(\Delta_k^{(m)}/2)} \right) + \sum_{m=1}^{M-1} \sum_{k \in \tilde{\mathcal{K}}^{(m)}} 1 + \frac{\rho \log(n)}{\psi(\gamma)}, \quad (14)$$

For such an  $n_{0,\Lambda}$  to exist, for a given  $\Lambda$ , we need both  $x_n, y_n$  sublinear. This is true since  $\rho > 4$ . In addition, observe that  $n_{0,\Lambda}$  grows only polylogarithmically in  $\Lambda$  since (14) reduces to  $n^p \gtrsim (\log(\Lambda))^{1/2}$  where  $p > 0$  depends on our choice of  $\rho$ .

By (13), the RHS of (14) is an upper bound on the number of plays at fidelities lower than  $M$ . Therefore, for all  $n \geq n_{0,\Lambda}$ ,

$$\begin{aligned} \mathbb{P}\left(Q_n^{(M)} < \frac{n}{2}\right) &\leq \sum_{m=1}^{M-1} \sum_{k \in \mathcal{K}^{(m)}} \mathbb{P}\left(T_{k,n}^{(m)} > x_{n,\delta} \left( 1 + \frac{\rho \log(n)}{\psi(\Delta_k^{(m)}/2)} \right)\right) + \mathbb{P}\left(T_{k,n}^{(>m)} > y_{n,\delta}\right) \quad (15) \\ &\leq \sum_{m=1}^{M-1} \sum_{k \in \mathcal{K}^{(m)}} \frac{\nu}{n^{\rho x_{n,\delta_\Lambda}-1}} + \frac{\nu \tilde{\kappa}_{k,\rho}^{(m)}}{(x_{n,\delta_\Lambda} \log(n))^{\rho-1}} + \frac{\nu M}{(\rho-1)y_{n,\delta_\Lambda}^{\rho-1}} + \frac{1}{2y_{n,\delta_\Lambda}^{\rho-2}} \\ &\leq K \left( 4 \times \frac{3\delta}{2Kn^2\pi^2} \right) \leq \frac{6\delta}{n^2\pi^2}. \end{aligned}$$

The last step follows from the fact that each of the four terms inside the summation in the second line are  $\leq 3\delta/(2Kn^2\pi^2)$ . For the last term we have used that  $(\rho-2)/2 > 1$  and that  $3\delta/(\pi^2 K)$  is smaller than 1. Note that the double summation just enumerates over all arms in  $\mathcal{K}$ .

We can now specify the conditions on  $\Lambda_0$ .  $\Lambda_0$  should be large enough so that for all  $\Lambda \geq \Lambda_0$ , we have  $\lfloor \Lambda/\lambda^{(M)} \rfloor \geq n_{0,\Lambda}$ . Such an  $\Lambda_0$  exists since  $n_{0,\Lambda}$  grows only polylogarithmically in  $\Lambda$ . This ensures that we have played a sufficient number of rounds to apply the concentration result in (15).

Let the (random) expended capital after  $n$  rounds of MF-UCB be  $\Omega(n)$ . Let  $\mathcal{E} = \{\exists n \geq n_{0,\Lambda} : \Omega(n) < n\lambda^{(M)}/2\}$ . Since  $\Omega(n) \geq \lambda^{(M)}Q_n^{(M)}$ , by using the union bound on (15) we have  $\mathbb{P}(\mathcal{E}) \leq \delta_\Lambda$ . Therefore,

$$\mathbb{P}\left(N > \frac{2\Lambda}{\lambda^{(M)}}\right) = \mathbb{P}\left(N > \frac{2\Lambda}{\lambda^{(M)}} \middle| \mathcal{E}\right) \underbrace{\mathbb{P}(\mathcal{E})}_{\leq \delta_\Lambda} + \underbrace{\mathbb{P}\left(N > \frac{2\Lambda}{\lambda^{(M)}} \middle| \mathcal{E}^c\right)}_{=0} \mathbb{P}(\mathcal{E}^c) < \delta_\Lambda$$

The last step uses the following reasoning: Conditioned on  $\mathcal{E}^c$ ,  $n > 2\Omega(n)/\lambda^{(M)}$  is false for  $n > n_{0,\Lambda}$ . In particular, it is true for the *random* number of plays  $N$  since  $\Lambda > \Lambda_0 \implies N \geq n_{0,\Lambda}$ . Now, clearly  $\Lambda > \Omega(N)$  and therefore  $N > 2\Lambda/\lambda^{(M)}$  is also false.

By noting that  $n_\Lambda = \Lambda/\lambda^{(M)}$  and that  $\log(\Lambda/\lambda^{(1)})$  is always an upper bound on  $\log(N)$ , we have,

$$\mathbb{E}[\log(N)] \leq \log(2n_\Lambda)\mathbb{P}(N < 2n_\Lambda) + \log\left(\frac{\Lambda}{\lambda^{(1)}}\right)\mathbb{P}(N > 2n_\Lambda) \leq \log(n_\Lambda) + 1 + \log(2) \quad (16)$$

Lemma 10 now follows by an application of Lemma 5. First we condition on  $N = n$  to obtain,

$$\begin{aligned} \mathbb{E}[R(\Lambda)|N = n] &\leq \mu_\star \lambda^{(M)} + \sum_{k=1}^K \sum_{m=1}^M \Delta_k^{(M)} \lambda^{(m)} T_{k,n}^{(m)} \\ &\leq \mu_\star \lambda^{(M)} + \sum_{k=1}^K \Delta_k^{(M)} \left( \sum_{\ell=1}^{[k]-1} \lambda^{(\ell)} \frac{\rho \log(n)}{\psi(\gamma^{(m)})} + \lambda^{([k])} \frac{\rho \log(n)}{\psi(\Delta_k^{([k])}/2)} + \kappa_\rho \lambda^{(M)} \right) \end{aligned}$$

The theorem follows by plugging in the above in  $\mathbb{E}[R(\Lambda)] = \mathbb{E}[\mathbb{E}[R(\Lambda)|N]]$  and using the bound for  $\mathbb{E}[\log(N)]$  in (16).

We can now bound the regret for MF-UCB.

**Proof of Theorem 2.** Recall that  $\psi(\gamma^{(m)}) = \frac{\lambda^{(m)}}{\lambda^{(m+1)}} \psi(\zeta^{(m)})$ . Plugging this into Lemma 10 we get

$$\begin{aligned} \mathbb{E}[R(\Lambda)] &\leq \mu_\star \lambda^{(M)} + \sum_{k=1}^K \Delta_k^{(M)} \left( \sum_{\ell=1}^{[k]-1} \lambda^{(\ell+1)} \frac{\rho(\log(n_\Lambda) + c)}{\psi(\zeta^{(\ell)})} + \lambda^{([k])} \frac{\rho(\log(n_\Lambda) + c)}{\psi(\Delta_k^{([k])}/2)} + \kappa_\rho \lambda^{(M)} \right) \\ &\leq \mu_\star \lambda^{(M)} + \sum_{k=1}^K \Delta_k^{(M)} \cdot \lambda^{([k])} \rho(\log(n_\Lambda) + c) \left( \frac{2}{\psi(\zeta^{([k]-1)})} + \frac{1}{\psi(\Delta_k^{([k])}/2)} \right) + \Delta_k^{(M)} \kappa_\rho \lambda^{(M)} \end{aligned}$$

The second step uses Assumption 1. The theorem follows by noting that for any  $k \in \mathcal{K}^{(m)}$  and  $\ell < m$ ,  $\Delta_k^{(m)} = \Delta_k^{(\ell)} + \zeta^{(\ell)} - \zeta^{(m)} + \mu_k^{(\ell)} - \mu_k^{(M)} + \mu_k^{(M)} - \mu_k^{(m)} \leq 2\gamma^{(\ell)} + 2\zeta^{(\ell)} \leq 4\zeta^{(\ell)}$ . Therefore  $1/\psi(\Delta_k^{(m)}) > c_1/\psi(\zeta^{(\ell)})$  where  $c_1$  depends on  $\psi$  (for sub-Gaussian distributions,  $c_1 = 1/16$ ).  $\square$

## B Lower Bound

The regret  $R_k$  incurred by any multi-fidelity strategy after capital  $\Lambda$  due to a suboptimal arm  $k$  is,

$$R_k(\Lambda) = \Delta_k^{(M)} \sum_{m=1}^M \lambda^{(m)} T_{k,N}^{(m)},$$

here  $N$  is the total number of plays. We then have,  $R(\Lambda) = \sum_k R_k(\Lambda)$ . For what follows, for an arm  $k$  and any fidelity  $m$  denote  $\text{KL}_k^{(m)} = \text{KL}(\mu_k^{(m)} \parallel \mu_\star - \zeta^{(m)})$ . The following lemma provides an asymptotic lower bound on  $R_k$ .

**Lemma 11.** Consider any set of Bernoulli reward distributions with  $\mu_\star \in (1/2, 1)$  and  $\zeta^{(1)} < 1/2$ . For any  $k$  with  $\Delta_k^{(\ell)} < 0$  for all  $\ell < p$  and  $\Delta_k^{(p)} > 0$ , there exists a problem dependent constant  $c_p$  such that any strategy satisfying Assumption 3 must satisfy,

$$\liminf_{\Lambda \rightarrow \infty} \frac{R_k(\Lambda)}{\log(n_\Lambda)} \geq c'_p \Delta_k^{(M)} \min_{\ell \geq p, \Delta_k^{(\ell)} > 0} \frac{\lambda^{(\ell)}}{\Delta_k^{(\ell)^2}}$$

*Proof.* For now we will fix  $N = n$  and consider any game after  $n$  rounds. Our proof we will modify the reward distributions of the given arm  $k$  for all  $\ell \geq p$  and show that any algorithm satisfying Assumption 3 will not be able to distinguish between both problems with high probability. Since

the KL divergence is continuous, for any  $\epsilon > 0$  we can choose  $\tilde{\mu}_k^{(p)} \in (\mu_\star - \zeta^{(p)}, \mu_\star - \zeta^{(p)} + \min_{\ell < p} -\Delta_k^{(\ell)})$  such that  $\text{KL}(\mu_k^{(p)} \parallel \tilde{\mu}_k^{(p)}) < (1 + \epsilon)\text{KL}(\mu_k^{(p)} \parallel \mu_\star - \zeta^{(p)}) = (1 + \epsilon)\text{KL}_k^{(p)}$ .

The modified construction for arm  $k$ , will also have Bernoulli distributions with means  $\tilde{\mu}_k^{(1)}, \tilde{\mu}_k^{(2)}, \dots, \tilde{\mu}_k^{(M)}$ .  $\tilde{\mu}_k^{(p)}$  will be picked to satisfy the two constraints above and for the remaining fidelities,

$$\tilde{\mu}_k^{(\ell)} = \mu_k^{(\ell)} \quad \text{for } \ell < p, \quad \tilde{\mu}_k^{(\ell)} = \tilde{\mu}_k^{(p)} + \zeta^{(p)} - \zeta^{(\ell)} \quad \text{for } \ell > p.$$

Now note that for  $\ell < p$ ,  $\tilde{\mu}_k^{(M)} - \tilde{\mu}_k^{(\ell)} = \tilde{\mu}_k^{(p)} + \zeta^{(p)} - \mu_k^{(\ell)} < \mu_\star - \zeta^{(p)} - \Delta_k^{(\ell)} + \zeta^{(p)} - \mu_k^{(\ell)} = \zeta^{(\ell)}$ ; similarly,  $\tilde{\mu}_k^{(M)} - \tilde{\mu}_k^{(\ell)} = \tilde{\mu}_k^{(p)} + \zeta^{(p)} - \mu_k^{(\ell)} > \mu_\star - \mu_k^{(\ell)} > \mu_k^{(M)} - \mu_k^{(\ell)} > -\zeta^{(\ell)}$ . For  $\ell > p$ ,  $\tilde{\mu}_k^{(M)} - \tilde{\mu}_k^{(\ell)} = \zeta^{(\ell)}$ . Hence, the modified construction satisfies the conditions on the lower fidelities laid out in Section 2 and we can use Assumption 3. Further  $\tilde{\mu}_k^{(M)} > \mu_\star$ , so  $k$  is the optimal arm in the modified problem. Now we use a change of measure argument.

Following Bubeck and Cesa-Bianchi [5], Lai and Robbins [9], denote the expectations, probabilities and distribution in the original problem as  $\mathbb{E}, \mathbb{P}, P$  and in the modified problem as  $\tilde{\mathbb{E}}, \tilde{\mathbb{P}}, \tilde{P}$ . Denote a sequence of observations when playing arm  $k$  at by  $\{Z_{k,t}^{(\ell)}\}_{t \geq 0}$  and define,

$$L_k^{(\ell)}(s) = \sum_{t=1}^s \log \left( \frac{\mu_k^{(\ell)} Z_{k,t}^{(\ell)} + (1 - \mu_k^{(\ell)})(1 - Z_{k,t}^{(\ell)})}{\tilde{\mu}_k^{(\ell)} Z_{k,t}^{(\ell)} + (1 - \tilde{\mu}_k^{(\ell)})(1 - Z_{k,t}^{(\ell)})} \right) = \sum_{t: Z_{k,t}^{(\ell)}=1} \log \frac{\mu_k^{(\ell)}}{\tilde{\mu}_k^{(\ell)}} + \sum_{t: Z_{k,t}^{(\ell)}=0} \log \frac{1 - \mu_k^{(\ell)}}{1 - \tilde{\mu}_k^{(\ell)}}.$$

Observe that  $\mathbb{E}[s^{-1} L_k^{(\ell)}(s)] = \text{KL}(\mu_k^{(\ell)} \parallel \tilde{\mu}_k^{(\ell)})$ . Let  $A$  be any event in the  $\sigma$ -field generated by the observations in the game.

$$\begin{aligned} \tilde{\mathbb{P}}(A) &= \int \mathbb{1}(A) d\tilde{P} = \int \mathbb{1}(A) \prod_{\ell=p}^M \left( \prod_{i=1}^{T_{k,n}^{(\ell)}} \frac{\tilde{\theta}_k^{(\ell)}(Z_{k,i}^{(\ell)})}{\theta_k^{(\ell)}(Z_{k,i}^{(\ell)})} \right) dP \\ &= \mathbb{E} \left[ \mathbb{1}(A) \exp \left( - \sum_{\ell \geq p} L_k^{(\ell)}(T_{k,n}^{(\ell)}) \right) \right] \end{aligned} \quad (17)$$

Now let  $f_n^{(\ell)} = C \log(n)$  for all  $\ell$  such that  $\Delta_k^{(\ell)} < 0$  and  $f_n^{(\ell)} = \frac{1}{M-p} \frac{1-\epsilon}{\text{KL}(\mu_k^{(p)} \parallel \tilde{\mu}_k^{(p)})} \log(n)$  otherwise.

(Recall that  $\Delta_k^{(\ell)} < 0$  for all  $\ell < p$  and  $\Delta_k^{(p)} > 0$ ).  $C$  is a large enough constant that we will specify shortly. Define the following event  $A_n$ .

$$A_n = \left\{ T_{k,n}^{(\ell)} \leq f_n^{(\ell)}, \forall \ell \quad \wedge \quad L_k^{(\ell)}(T_{k,n}^{(\ell)}) \leq \frac{1}{M-p} (1 - \epsilon/2) \log(n), \forall \ell : \Delta_k^{(\ell)} > 0 \right\}$$

By (17) we have  $\tilde{\mathbb{P}}(A_n) \geq \mathbb{P}(A_n) n^{-(1-\epsilon/2)}$ . Since  $k$  is the unique optimal arm in the modified construction, by Assumptions 3 we have  $\forall a > 0$ ,

$$\tilde{\mathbb{P}}(A_n) \leq \mathbb{P} \left( \sum_m T_{k,n}^{(m)} < \Theta(\log(n)) \right) \leq \frac{\mathbb{E}[n - \sum_m T_{k,n}^{(m)}]}{n - \Theta(\log(n))} \in o(n^{a-1})$$

By choosing  $a < \epsilon/2$  we have  $\mathbb{P}(A_n) \rightarrow 0$  as  $n \rightarrow \infty$ . Next, we upper bound the probability of  $A_n$  in the original problem as follows,

$$\mathbb{P}(A_n) \geq \mathbb{P} \left( \underbrace{T_{k,n}^{(\ell)} \leq f_n^{(\ell)}, \forall \ell}_{A_{n,1}} \quad \wedge \quad \underbrace{\max_{s \leq f_n} L_k^{(\ell)}(s) \leq \frac{1}{M-p} (1 - \epsilon/2) \log n, \forall \ell : \Delta_k^{(\ell)} > 0}_{A_{n,2}} \right)$$

We will now show that  $A_{n,2}$  remains large as  $n \rightarrow \infty$ . Writing  $A_{n,2} = \bigcap_{\ell: \Delta_k^{(\ell)} > 0} A_{n,2,\ell}$ , we have

$$\mathbb{P}(A_{n,2,\ell}) = \mathbb{P} \left( \frac{f_n^{(\ell)}(M-p)}{(1-\epsilon)\log(n)} \cdot \frac{1}{f_n^{(\ell)}} \max_{s \leq f_n^{(\ell)}} L_k^{(m)}(s) \leq \frac{1-\epsilon/2}{1-\epsilon} \right).$$

As  $f_n^{(\ell)} \rightarrow \infty$ , by the strong law of large numbers  $\frac{1}{f_n^{(\ell)}} \max_{s \leq f_n^{(\ell)}} L_k^{(m)}(s) \rightarrow \text{KL}(\mu_k^{(m)} \parallel \tilde{\mu}_k^{(m)})$ . After substituting for  $f_n^{(\ell)}$  and repeating for all  $\ell$ , we get  $\lim_{n \rightarrow \infty} \mathbb{P}(A_{n,2}) = 1$ . Therefore,  $\mathbb{P}(A_{n,1}) \leq o(1)$ . To conclude the proof, we upper bound  $\mathbb{E}[R_k(\Lambda)]$  as follows,

$$\begin{aligned} \frac{\mathbb{E}[R_k(\Lambda)]}{\Delta_k^{(M)}} &\geq \mathbb{P}(\exists \ell \text{ s.t. } T_{k,N}^{(\ell)} > f_N^{(\ell)}) \cdot \mathbb{E}[R_k(\Lambda) \mid \exists \ell \text{ s.t. } T_{k,N}^{(\ell)} > f_N^{(\ell)}] \geq \mathbb{P}(\overline{A_{n,1}}) \cdot \min_{\ell} f_{n_\Lambda}^{(\ell)} \lambda^{(\ell)} \\ &\geq (1 - o(1)) \min_{\ell \geq p} \frac{(1 - \epsilon) \log(n_\Lambda) \lambda^{(\ell)}}{(M - p) \text{KL}(\mu_k^{(\ell)} \parallel \tilde{\mu}_k^{(\ell)})} \geq \frac{\log(n_\Lambda)}{M - p} (1 - o(1)) \frac{1 - \epsilon}{1 + \epsilon} \min_{\ell > m} \frac{\lambda^{(\ell)}}{\text{KL}_k^{(\ell)}} \end{aligned}$$

Above, the second step uses the fact that  $N \geq n_\Lambda$  and  $\log$  is increasing. In the third step, we have chosen  $C > \max_{\ell \geq p} \lambda^{(\ell)} \Delta_k^{(M)} / \text{KL}(\mu_k^{(\ell)} \parallel \tilde{\mu}_k^{(\ell)})$  for  $\ell < p$  large enough so that the minimiser will be at  $\ell \geq p$ . The lemma follows by noting that the statements holds for all  $\epsilon > 0$  and that for Bernoulli distributions with parameters  $\mu_1, \mu_2$ ,  $\text{KL}(\mu_1 \parallel \mu_2) \leq (\mu_1 - \mu_2)^2 / (\mu_2(1 - \mu_2))$ . The constant given in the theorem is  $c'_p = \frac{1}{M-p} \min_{\ell > p} (\mu_\star - \zeta^{(\ell)})(1 - \mu_\star + \zeta^{(\ell)})$ .  $\square$

We can now use the above Lemma to prove theorem 4.

**Proof of Theorem 4.** Let  $k \in \mathcal{K}_\star^{(m)}$ . We will use Lemma 11 with  $p = m$ . It is sufficient to show that  $\lambda^{(\ell)} / \Delta_k^{(\ell)^2} \gtrsim \lambda^{(m)} / \Delta_k^{(m)^2}$  for all  $\ell > m$ . First note that

$$\Delta_k^{(\ell)} = \mu_\star - \mu_k^{(m)} - \zeta^{(m)} + \mu_k^{(m)} - \mu_\star + \mu_\star - \mu_k^{(\ell)} + \zeta^{(m)} - \zeta^{(\ell)} \leq \Delta_k^{(m)} + 2\zeta^{(m)} \leq 2\Delta_k^{(m)} \sqrt{\frac{\lambda^{(m+1)}}{\lambda^{(m)}}}$$

Here the last step uses that  $\Delta_k^{(m)} > 2\gamma^{(m)} = \sqrt{\lambda^{(m)} / \lambda^{(m+1)}} \zeta^{(m)}$ . Here we have used  $\psi(\epsilon) = 2\epsilon^2$  which is just Hoeffding's inequality. Therefore,  $\frac{\lambda^{(m)}}{\Delta_k^{(m)^2} \leq 4 \frac{\lambda^{(m+1)}}{\Delta_k^{(\ell)^2}} \leq 4 \frac{\lambda^{(\ell)}}{\Delta_k^{(\ell)^2}}$ .

When  $k \in \mathcal{K}_\star^{(m)}$ , we use Lemma 11 with  $p = \ell_0 = \min\{\ell; \Delta_k^{(\ell)} > 0\}$ . However, by repeating the same argument as above, we can eliminate all  $\ell > m$ . Hence, we only need to consider  $\ell$  such that  $\ell_0 \leq \ell \leq m$  and  $\Delta_k^{(\ell)} > 0$  in the minimisation of Lemma 11. This is precisely the set  $\mathcal{L}_m(k)$  given in the theorem. The theorem follows by repeating the above argument for all arms  $k \in \mathcal{K}$ . The constant  $c_p$  in Theorem 4 is  $c'_p/4$  where  $c'_p$  is from Lemma 11.  $\square$

## C Details on the Simulations

We present the details on the simulations used in the experiment. Denote  $\vec{\zeta} = (\zeta^{(1)}, \zeta^{(2)}, \dots, \zeta^{(M)})$  and  $\vec{\lambda} = (\lambda^{(1)}, \lambda^{(2)}, \dots, \lambda^{(M)})$ . Figure 3 illustrates the mean values of these arms.

1. Gaussian:  $M = 500$ ,  $M = 3$ ,  $\vec{\zeta} = (0.2, 0.1, 0)$ ,  $\vec{\lambda} = (1, 10, 1000)$ .  
The high fidelity means were chosen to be a uniform grid in  $(0, 1)$ . The Gaussian distributions had standard deviation 0.2.
2. Gaussian:  $M = 500$ ,  $M = 4$ ,  $\vec{\zeta} = (1, 0.5, 0.2, 0)$ ,  $\vec{\lambda} = (1, 5, 20, 50)$ .  
The high fidelity means were sampled from a  $\mathcal{N}(0, 1)$  distribution. The Gaussian distributions had standard deviation 1.
3. Bernoulli:  $M = 200$ ,  $M = 2$ ,  $\vec{\zeta} = (0.2, 0)$ ,  $\vec{\lambda} = (1, 10)$ .  
The high fidelity means were chosen to be a uniform grid in  $(0.1, 0.9)$ . The Gaussian distributions had standard deviation 1.
4. Bernoulli:  $M = 1000$ ,  $M = 5$ ,  $\vec{\zeta} = (0.5, 0.2, 0.1, 0.05, 0)$ ,  $\vec{\lambda} = (1, 3, 10, 30, 100)$ .  
The high fidelity means were chosen to be a uniform grid in  $(0.1, 0.9)$ . The Gaussian distributions had standard deviation 1.

In all cases above, the lower fidelity means were sampled uniformly within a  $\pm \zeta^{(m)}$  band around  $\mu_k^{(M)}$ . In addition, for the Gaussian distributions we modified the lower fidelity means of the optimal arm  $\mu_{k_\star}^{(m)}$ ,  $m < M$  to be lower than the corresponding mean of a suboptimal arm. For the Bernoulli

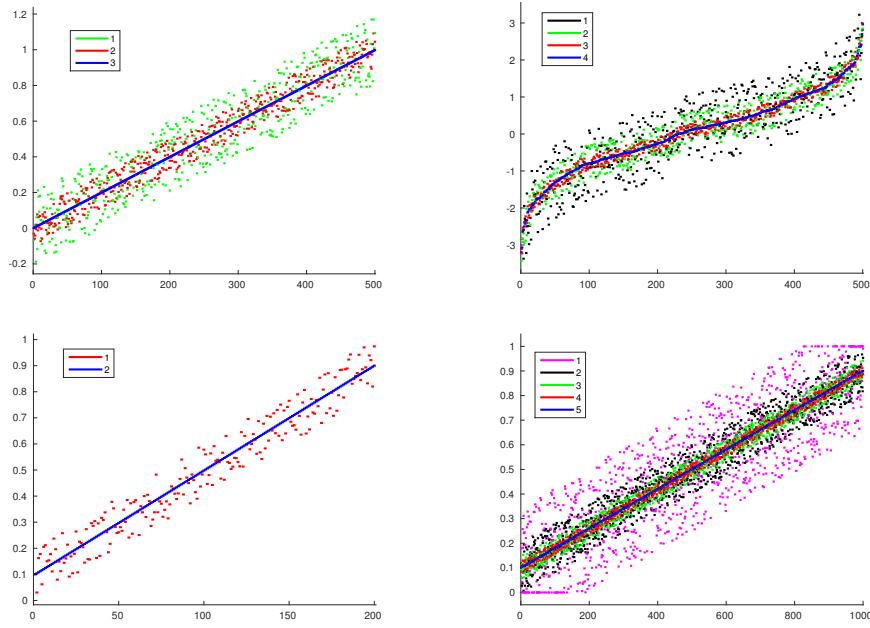

Figure 3: An illustration of the means of the arms used the simulation problems. The top row are the Gaussian rewards with  $(K, M)$  equal to  $(500, 3)$ ,  $(500, 4)$  while the second row are the Bernoulli rewards with  $(200, 2)$ ,  $(1000, 5)$  respectively.

rewards, if  $\mu_k^{(m)}$  fell outside of  $(0, 1)$  its value was truncated. Figure 3 illustrates the mean values of these arms.

For both MF-UCB and UCB we used  $\rho = 2$  [5].

### Acknowledgements

We would like to thank anonymous reviewers from COLT 2016 and NIPS 2016 for the helpful comments on the content, structure and presentation. This research is partly funded by DOE grant DESC0011114.
